# Supplementary material for: Cigar Warning Noticing and Demographic and Usage Correlates: Analysis from the United States Population Assessment of Tobacco and Health Study, Wave 5
Source: MDPI journal article supplement (doi:10.3390/ijerph19063221), 2022-03-09
Supplement: s1 [file s1]

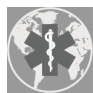

# Supplementary Materials

**Table S1.** Demographic and usage characteristics of current every-day/some-day users, by product type.

|                                              | <b>Cigarillo</b> | <b>Filtered Cigar</b> | <b>Traditional Cigar</b> |
|----------------------------------------------|------------------|-----------------------|--------------------------|
| <b>Sex</b>                                   | (n=1383)         | (n=673)               | (n=1359)                 |
| male                                         | 70.65%           | 66.72%                | 86.97%                   |
| <b>Age</b>                                   | (n=1385)         | (n=675)               | (n=1361)                 |
| 18-34                                        | 50.50%           | 40.93%                | 36.31%                   |
| 35-54                                        | 33.92%           | 34.48%                | 37.26%                   |
| 55+                                          | 15.57%           | 24.60%                | 26.43%                   |
| <b>Race/Ethnicity</b>                        | (n=1372)         | (n=663)               | (n=1342)                 |
| Non-Hispanic (NH) White                      | 47.78%           | 50.23%                | 66.40%                   |
| NH Black                                     | 31.38%           | 23.38%                | 13.43%                   |
| NH Other                                     | 5.48%            | 6.49%                 | 6.88%                    |
| Hispanic                                     | 15.37%           | 19.90%                | 13.29%                   |
| <b>Education</b>                             | (n=1379)         | (n=673)               | (n=1355)                 |
| Less than high school/GED                    | 23.46%           | 30.69%                | 12.53%                   |
| High school graduate                         | 27.93%           | 32.80%                | 20.12%                   |
| Some college (no degree) or Associates       | 35.36%           | 26.12%                | 33.11%                   |
| Bachelor's degree or advanced degree         | 13.25%           | 10.40%                | 34.24%                   |
| <b>Income</b>                                | (n=1321)         | (n=636)               | (n=1317)                 |
| less than \$24,999                           | 46.95%           | 62.36%                | 21.65%                   |
| 25,000-49,999                                | 23.32%           | 21.85%                | 21.01%                   |
| 50,000-99,999                                | 18.75%           | 11.41%                | 24.97%                   |
| 100,000 or more                              | 10.98%           | 4.37%                 | 32.37%                   |
| <b>Type of user</b>                          | (n=1384)         | (n=674)               | (n=1361)                 |
| Established                                  | 59.46%           | 59.90%                | 42.89%                   |
| Experimental                                 | 40.54%           | 40.10%                | 57.11%                   |
| <b>Use frequency</b>                         | (n=1385)         | (n=675)               | (n=1361)                 |
| every day                                    | 14.81%           | 28.43%                | 5.20%                    |
| some days                                    | 85.19%           | 71.57%                | 94.80%                   |
| <b>Past-30 day product use</b>               | (n=1385)         | (n=675)               | (n=1361)                 |
| yes                                          | 85.28%           | 84.11%                | 70.45%                   |
| <b>Current cigarette smoker</b>              | (n=1382)         | (n=674)               | (n=1359)                 |
| yes                                          | 59.54%           | 78.58%                | 35.72%                   |
| <b>Current e-cig user</b>                    | (n=1385)         | (n=675)               | (n=1361)                 |
| yes                                          | 28.81%           | 30.08%                | 19.33%                   |
| <b>Past 12-month any cigar use as blunts</b> | (n=1381)         | (n=673)               | (n=1359)                 |
| yes                                          | 47.71%           | 43.21%                | 26.85%                   |
| <b>Cigar purchase type</b>                   | (n=1378)         | (n=667)               | (n=1355)                 |
| Box                                          | 42.69%           | 59.51%                | 21.66%                   |
| Single                                       | 46.02%           | 25.78%                | 59.22%                   |
| Don't buy own cigars                         | 11.29%           | 14.70%                | 19.12%                   |

**Table S2.** Weighted Logistic regression: Noticing cigar warnings by demographics/use, among every-day/some-day product users.

| Variable                          | Cigarillo Warning Noticing (n = 1294) |              | Filtered Cigar Warning Noticing (n = 615) |             | Traditional Cigar Warning Noticing (n = 1292) |              |
|-----------------------------------|---------------------------------------|--------------|-------------------------------------------|-------------|-----------------------------------------------|--------------|
|                                   | Odds Ratio (CI)                       | p- value     | Odds Ratio                                | p- value    | Odds Ratio                                    | p- value     |
| <b>Sex</b>                        |                                       |              |                                           |             |                                               |              |
| male                              | ref                                   | ref          | ref                                       | ref         | ref                                           | ref          |
| female                            | 1.05 (.74, 1.5)                       | 0.80         | 1.33 (.76, 2.30)                          | 0.31        | .57 (.31, 1.06)                               | 0.08         |
| <b>Age</b>                        |                                       |              |                                           |             |                                               |              |
| 18-34                             | ref                                   | ref          | ref                                       | ref         | ref                                           | ref          |
| 35-54                             | <b>0.64 (0.43, 0.93)</b>              | <b>0.021</b> | 1.13 (.64, 1.98)                          | 0.67        | .99 (.62, 1.59)                               | 0.97         |
| 55+                               | 0.62 (0.33, 1.17)                     | 0.14         | 1.55 (.78, 3.08)                          | 0.21        | .84 (.50, 1.42)                               | 0.52         |
| <b>Race/Ethnicity</b>             |                                       |              |                                           |             |                                               |              |
| NH White                          | ref                                   | ref          | ref                                       | ref         | ref                                           | ref          |
| NH Black                          | <b>1.94 (1.30, 2.89)</b>              | <b>0.001</b> | 1.38 (.81, 2.37)                          | 0.23        | 1.21 (.68, 2.17)                              | 0.51         |
| Hispanic                          | 1.70 (.99, 2.93)                      | 0.053        | 1.68 (.83, 3.39)                          | 0.14        | 1.04 (.47, 2.26)                              | 0.93         |
| NH Other                          | <b>2.06 (1.03, 4.13)</b>              | <b>0.042</b> | .69 (.23, 2.02)                           | 0.49        | <b>3.52 (1.61, 7.72)</b>                      | <b>0.002</b> |
| <b>Education</b>                  |                                       |              |                                           |             |                                               |              |
| Less than high school/GED         | ref                                   | ref          | ref                                       | ref         | ref                                           | ref          |
| High school graduate              | 0.76 (.49, 1.18)                      | 0.22         | 0.79 (.44, 1.43)                          | 0.43        | 1.61 (.87, 2.97)                              | 0.13         |
| Some college/Associates           | 1.09 (.69, 1.71)                      | 0.72         | .88 (.45, 1.75)                           | 0.72        | .77 (.43, 1.38)                               | 0.37         |
| Bachelor's/advanced degree        | 0.79 (.38, 1.67)                      | 0.54         | .57 (.20, 1.64)                           | 0.30        | 1.12 (.59, 2.10)                              | 0.73         |
| <b>Income</b>                     |                                       |              |                                           |             |                                               |              |
| less than \$24,999                | ref                                   | ref          | ref                                       | ref         | ref                                           | ref          |
| 25,000-49,999                     | 0.73 (.47, 1.12)                      | 0.14         | <b>.47 (.25, .90)</b>                     | <b>0.02</b> | .58 (.34, 1.00)                               | 0.051        |
| 50,000-99,999                     | 1.08 (.64, 1.85)                      | 0.76         | 1.23 (.48, 3.11)                          | 0.66        | .82 (.45, 1.50)                               | 0.51         |
| 100,000 or more                   | 0.72 (.35, 1.47)                      | 0.36         | .67 (.16, 2.71)                           | 0.57        | .56 (.30, 1.05)                               | 0.07         |
| <b>Use Frequency</b>              |                                       |              |                                           |             |                                               |              |
| some days                         | ref                                   | ref          | ref                                       | ref         | ref                                           | ref          |
| every day                         | <b>2.27 (1.40, 3.69)</b>              | <b>0.001</b> | <b>1.94 (1.13, 3.33)</b>                  | <b>0.02</b> | <b>2.95 (1.02, 8.51)</b>                      | <b>0.045</b> |
| <b>Current Cigarette Smoker</b>   |                                       |              |                                           |             |                                               |              |
| no                                | ref                                   | ref          | ref                                       | ref         | ref                                           | ref          |
| yes                               | <b>.63 (.43, .92)</b>                 | <b>0.017</b> | <b>.53 (.29, .98)</b>                     | <b>0.04</b> | <b>.49 (.29, .83)</b>                         | <b>0.009</b> |
| <b>Current E-Cigarette Smoker</b> |                                       |              |                                           |             |                                               |              |
| no                                | ref                                   | ref          | ref                                       | ref         | ref                                           | ref          |
| yes                               | .76 (.56, 1.04)                       | 0.09         | 1.00 (.60, 1.67)                          | 0.996       | 1.35 (.83, 2.17)                              | 0.22         |
| <b>Past-12 Month Blunt Use</b>    |                                       |              |                                           |             |                                               |              |
| no                                | ref                                   | ref          | ref                                       | ref         | ref                                           | ref          |
| yes                               | <b>1.57 (1.10, 2.25)</b>              | <b>0.014</b> | 1.13 (.62, 2.08)                          | 0.68        | 1.17 (.69, 2.00)                              | 0.55         |
| <b>Cigar Purchase Type</b>        |                                       |              |                                           |             |                                               |              |
| Box/pack (in person)              | ref                                   | ref          | ref                                       | ref         | ref                                           | ref          |
| Not in person                     | <b>0.40 (.21, .77)</b>                | <b>0.007</b> | 0.45 (.19, 1.04)                          | 0.06        | <b>.22 (.08, .57)</b>                         | <b>0.002</b> |
| Singles (in person)               | 0.71 (.50, 1.01)                      | 0.058        | 0.98 (.57, 1.66)                          | 0.93        | <b>.49 (.32, .76)</b>                         | <b>0.002</b> |
